# Supplementary material for: Solution-processed Sb 2 Se 3 photocathodes under Se-rich conditions and their photoelectrochemical properties
Source: Royal Society of Chemistry journal article supplement (doi:10.1039/d3ra07023a), 2024-01-01
Supplement: d3ra07023a1.pdf [file d3ra07023a1.pdf]

## Supplementary Information

### **Solution-processed $\text{Sb}_2\text{Se}_3$ Photocathodes under Se-rich Conditions and Their Photoelectrochemical Properties**

Hui Jin Jin<sup>1,2</sup>, Chaeyong Seong<sup>1,3</sup>, Gyu Wan Choi<sup>1,2</sup>, Ji-Youn Seo<sup>2\*</sup>, Min-Kyu Son<sup>1\*</sup>

<sup>1</sup>Nano Convergence Materials Center, Emerging Materials R&D Division, Korea Institute of Ceramic Engineering & Technology (KICET), Jinju 52851, Republic of Korea

<sup>2</sup>Department of Nano Fusion Technology, Pusan National University, Busan 46241, Republic of Korea

<sup>3</sup>Department of Materials Science and Engineering, Korea University, Seoul 02841, Republic of Korea

\*E-mail: [j-y.seo@pusan.ac.kr](mailto:j-y.seo@pusan.ac.kr), [minkyu.son@kicet.re.kr](mailto:minkyu.son@kicet.re.kr)

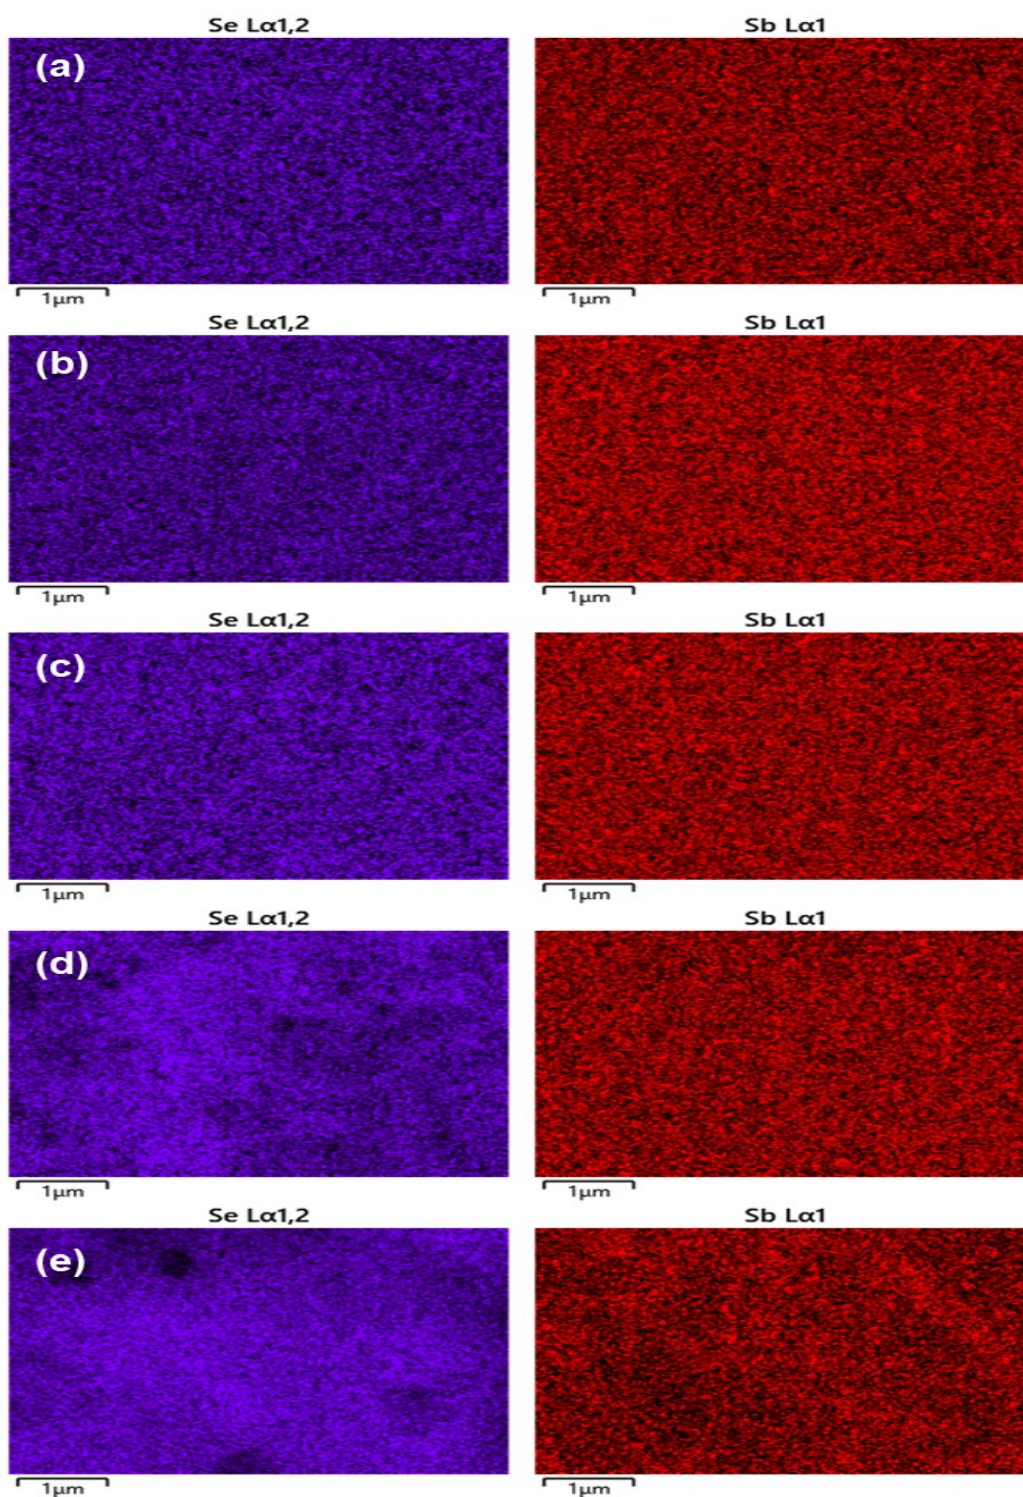

**Figure S1.** EDX elemental map showing proportional distribution of Sb and Se. a) Sb:Se = 1:1.5, b) Sb:Se = 1:3, c) Sb:Se = 1:4.5, d) Sb:Se = 1:7.5, e) Sb:Se = 1:9.

**Table S1.** Sb and Se atomic ratios detected by EDX system.

| Sb:Se | Se    | Sb    |
|-------|-------|-------|
| 1:1.5 | 29.63 | 4.64  |
| 1:3   | 34.64 | 7.20  |
| 1:4.5 | 37.49 | 8.72  |
| 1:7.5 | 50.48 | 7.16  |
| 1:9   | 71.50 | 10.52 |

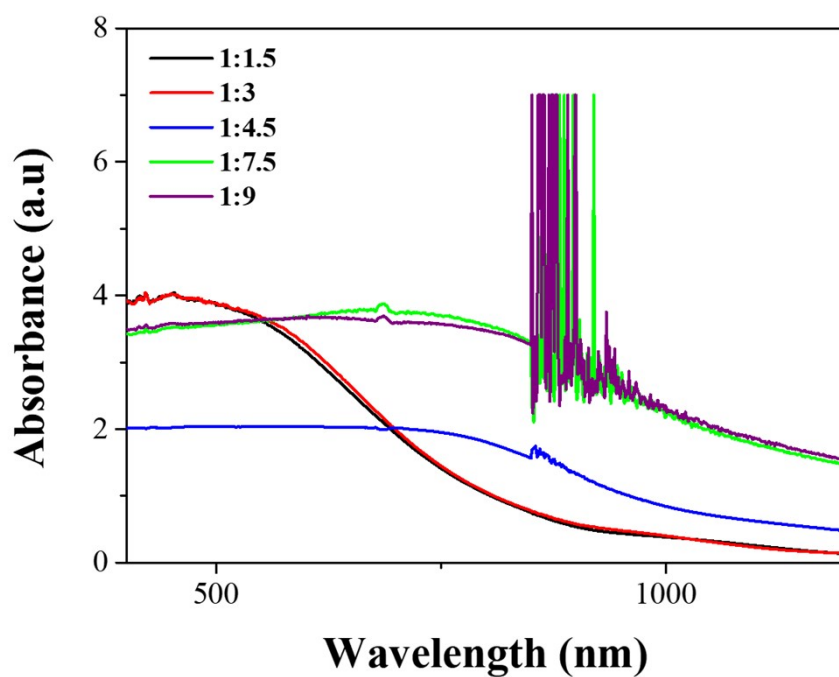

**Figure S2.** Absorbance spectra of  $\text{Sb}_2\text{Se}_3$  photocathodes with different molar ratios of Sb:Se; 1:1.5 (black), 1:3 (red), 1:4.5 (blue), 1:7.5 (green) and 1:9 (purple).

**Table S2.** Estimated band gap of  $\text{Sb}_2\text{Se}_3$  photocathodes with different molar ratios of Sb:Se from Tauc-plot.

| Sb:Se         | 1:1.5 | 1:3  | 1:4.5 | 1:7.5 | 1:9  |
|---------------|-------|------|-------|-------|------|
| Band gap (eV) | 1.73  | 1.71 | 1.25  | 1.15  | 1.14 |

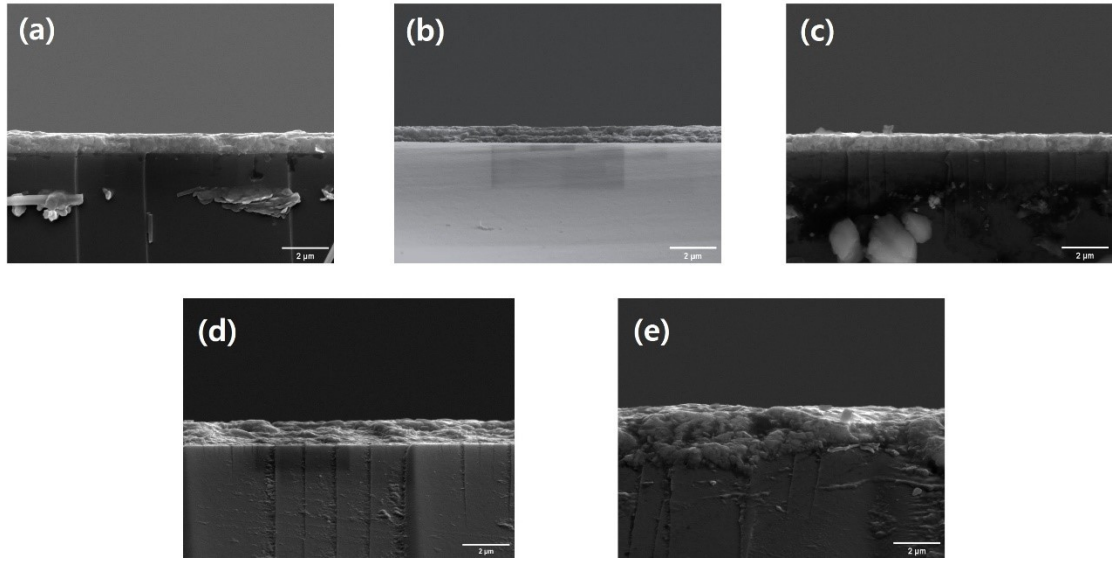

**Figure S3.** Cross-view FE-SEM images of the solution processed  $\text{Sb}_2\text{Se}_3$  films with different molar ratios of Sb and Se. (a) Sb:Se = 1:1.5, (b) Sb:Se = 1:3, (c) Sb:Se = 1:4.5, (d) Sb:Se = 1:7.5, and (e) Sb:Se = 1:9.

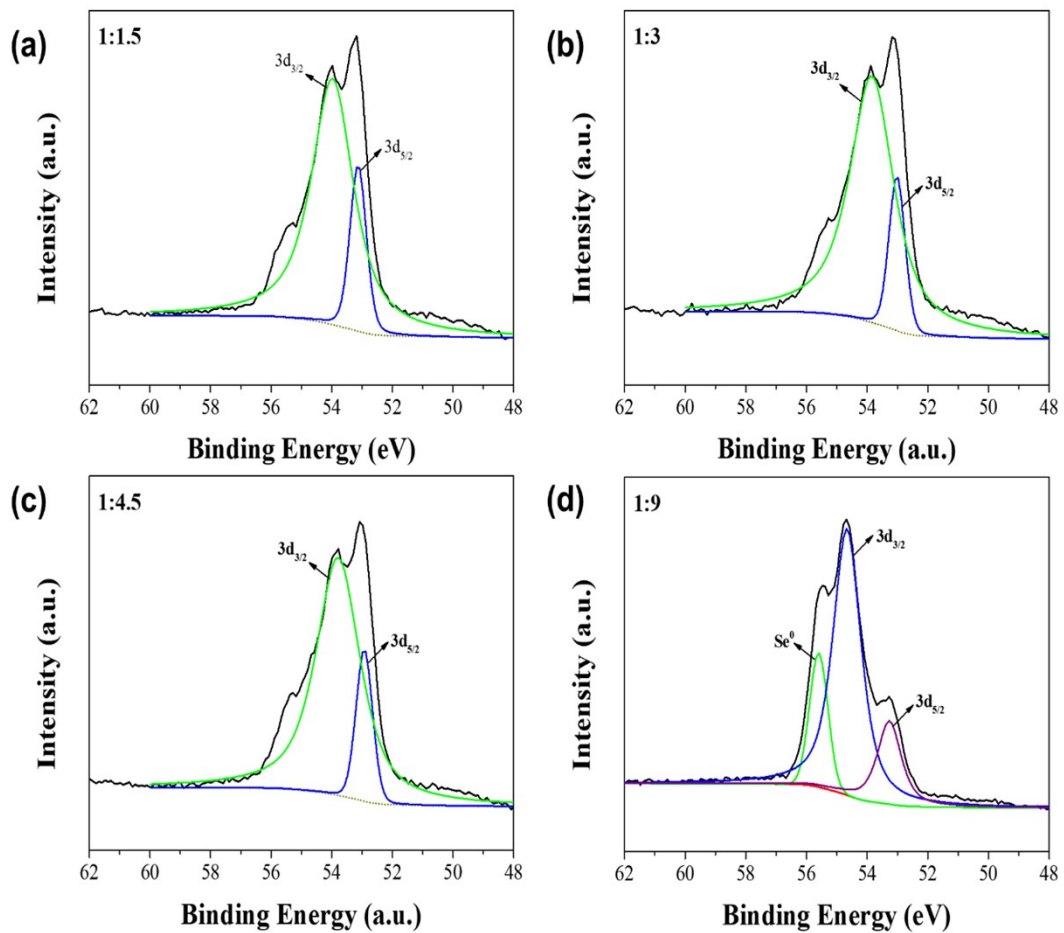

**Figure S4.** XPS spectra in Se 3d of  $\text{Sb}_2\text{Se}_3$  photocathode according to Sb:Se molar ratios. (a) Sb:Se = 1:1.5, (b) Sb:Se = 1:3, (c) Sb:Se = 1:4.5, (d) Sb:Se = 1:7.5, and (e) Sb:Se = 1:9.

**Table S3.** Photoelectrochemical performances of Sb<sub>2</sub>Se<sub>3</sub> photocathode in other literatures and our work. (SnS<sub>2</sub> : Tin sulfide, Fh : Ferrihydrite, MoS<sub>x</sub> : Molybdenum sulfide, RuO<sub>x</sub> : Ruthenium oxide, OL : Organic layer, CdS : Cadmium sulfide, Cu:NiO<sub>x</sub> : Cu-doped nickel oxide, C<sub>60</sub> : Fullerene)

| Fabrication method                    | Composition (Substrate: FTO)                                               | Onset Potential (V vs RHE) | Photocurrent density (mA/cm <sup>2</sup> at 0 V vs RHE) | Electrolyte                                  | Ref.     |
|---------------------------------------|----------------------------------------------------------------------------|----------------------------|---------------------------------------------------------|----------------------------------------------|----------|
| Vapor transport deposition            | Sb <sub>2</sub> Se <sub>3</sub>                                            | 0.3                        | -0.02                                                   | 0.5 M Na <sub>2</sub> SO <sub>4</sub> (pH 7) | 10       |
|                                       | Sb <sub>2</sub> Se <sub>3</sub> /SnS <sub>2</sub> /Fh                      | 0.3                        | -1.0                                                    |                                              |          |
| Electrodeposition                     | Sb <sub>2</sub> Se <sub>3</sub>                                            | 0.2                        | -0.1                                                    | Na <sub>2</sub> SO <sub>4</sub> (pH 6.5)     | 8        |
|                                       | Sb <sub>2</sub> Se <sub>3</sub> /Pt                                        | 0.2                        | -1.4                                                    |                                              |          |
| Electrodeposition of Sb /Selenization | Au/Sb <sub>2</sub> Se <sub>3</sub>                                         | .                          | .                                                       | 1 M H <sub>2</sub> SO <sub>4</sub> (pH 0)    | 21       |
|                                       | Au/Sb <sub>2</sub> Se <sub>3</sub> /MoS <sub>x</sub>                       | 0.12                       | -6                                                      |                                              |          |
|                                       | Au/Sb <sub>2</sub> Se <sub>3</sub> /MoS <sub>x</sub> (Sulfurization)       | 0.25                       | -14                                                     |                                              |          |
| Sputtering of Sb /Selenization        | Mo/Sb <sub>2</sub> Se <sub>3</sub> /CdS/TiO <sub>2</sub> /Pt               | 0.54                       | -35.7                                                   | 0.5 M H <sub>2</sub> SO <sub>4</sub>         | 16       |
| Sputtering of Sb /Selenization        | Mo/Sb <sub>2</sub> Se <sub>3</sub> /TiO <sub>2</sub> /Pt                   | 0.3                        | -20                                                     | 1 M H <sub>2</sub> SO <sub>4</sub>           | 18       |
| Close space sublimation               | Au/Sb <sub>2</sub> Se <sub>3</sub> /TiO <sub>2</sub> /RuO <sub>x</sub>     | 0.4                        | -30                                                     | H <sub>2</sub> SO <sub>4</sub> (pH 1)        | 20       |
|                                       | Au/Sb <sub>2</sub> Se <sub>3</sub> /CdS/TiO <sub>2</sub> /Pt               | 0.5                        | -18.5                                                   |                                              |          |
| Close space sublimation               | Au/Sb <sub>2</sub> Se <sub>3</sub> /OL/TiO <sub>2</sub> /Pt                | 0.5                        | -35                                                     | H <sub>2</sub> SO <sub>4</sub> (pH 1)        | 7        |
| Solution process                      | Au/Sb <sub>2</sub> Se <sub>3</sub> /TiO <sub>2</sub> /Pt                   | 0.3                        | -30                                                     | 0.1 M H <sub>2</sub> SO <sub>4</sub> (pH 1)  | 23       |
| Solution process                      | Au/Sb <sub>2</sub> Se <sub>3</sub> /CdS/TiO <sub>2</sub> /Pt               | 0.5                        | -14                                                     | H <sub>2</sub> SO <sub>4</sub> (pH 1)        | 24       |
| Solution process                      | Au/Sb <sub>2</sub> Se <sub>3</sub>                                         | 0.5                        | -0.32                                                   | 0.5 M H <sub>2</sub> SO <sub>4</sub>         | 26       |
|                                       | Au/Sb <sub>2</sub> Se <sub>3</sub> /TiO <sub>2</sub> /Pt                   | > 0.4                      | -2.5                                                    |                                              |          |
| Solution process                      | Sb <sub>2</sub> Se <sub>3</sub> /TiO <sub>2</sub> /Pt                      | 0.3                        | -10                                                     | H <sub>2</sub> SO <sub>4</sub> (pH 1)        | 11       |
|                                       | Cu:NiO <sub>x</sub> /Sb <sub>2</sub> Se <sub>3</sub> /TiO <sub>2</sub> /Pt | 0.34                       | -17.5                                                   |                                              |          |
| Solution process                      | Au/Sb <sub>2</sub> Se <sub>3</sub> /TiO <sub>2</sub> /Pt                   | 0.35                       | -12.5                                                   | 0.1 M H <sub>2</sub> SO <sub>4</sub> (pH 1)  | 17       |
| Solution process                      | Au/Sb <sub>2</sub> Se <sub>3</sub> /TiO <sub>2</sub> /C <sub>60</sub> /Pt  | 0.4                        | -17                                                     | H <sub>2</sub> SO <sub>4</sub> (pH 1)        | 6        |
| Solution process                      | Au/Sb <sub>2</sub> Se <sub>3</sub>                                         | 0.3                        | -0.18                                                   | 0.5 M H <sub>2</sub> SO <sub>4</sub>         | 9        |
|                                       | Au/Sb <sub>2</sub> Se <sub>3</sub> /TiO <sub>2</sub> /Pt                   | 0.3                        | -11.3                                                   |                                              |          |
| Solution process                      | Sb <sub>2</sub> Se <sub>3</sub>                                            | 0.45                       | -0.24                                                   | 0.1 M H <sub>2</sub> SO <sub>4</sub> (pH 1)  | Our work |
